---

# Erratum

Rajakumar K, de las Heras J, Lee S, Holick MF, Arslanian SA. 25-Hydroxyvitamin D concentrations and in vivo insulin sensitivity and  $\beta$ -cell function relative to insulin sensitivity in black and white youth. *Diabetes Care* 2012;35:627–633

In the print version of the article listed above, in the “Biochemical Measurements” section, the sentence “The intrassay and interassay coefficients of variation were 8 ng/mL and 10 ng/mL, respectively” should read as follows: “The intraassay and interassay coefficients of variation were 8% and 10%, respectively.” The online version reflects these changes.
